# Supplementary material
Source: PubMed Central journal article supplement (PMC8237633)
Supplement: pnas.2022115118.sapp.pdf [file pnas.2022115118.sapp.pdf]

**Supplementary Information for**

Chemical and Genetic Rescue of In Vivo Progranulin-Deficient Lysosomal and Autophagic Defects

James J. Doyle, Claudia Maios, Céline Vrancx, Sarah Duhaime, Babykumari Chitramuthu, Hugh P. J. Bennett, Andrew Bateman, J. Alex Parker\*

\* Corresponding author

J. Alex Parker [ja.parker@umontreal.ca](mailto:ja.parker@umontreal.ca)

This PDF file includes:

Table S1

Figures S1 to S5

| Compound name                  | Effective in <i>C. elegans</i>   | Effective in human NSC34 cells | Known functions                                 | BBB permeability | References                                       |
|--------------------------------|----------------------------------|--------------------------------|-------------------------------------------------|------------------|--------------------------------------------------|
| Rivastigmine                   | ✓                                | ✓                              | Acetylcholinesterase inhibitor                  | ✓                | Int J Mol Sci. 2014 Jun; 15(6): 9809–9825        |
| Rottlerin                      | ✓                                | ✓                              | Protein kinase C inhibitor                      | Unknown          | Neurosci Lett. 2010 Jan; 468(3): 254-8           |
| Resveratrol                    | ✓                                | ✗                              | SIRT1 activator                                 | ✓                | Front Aging Neurosci. 2014 Sep; 6: 218           |
| Pirenzepine dihydrochloride    | ✓                                | ✗                              | Acetylcholine receptor agonist                  | ✓                | Scand J Gastroenterol Suppl. 1980; 66: 35-7      |
| Azatadine maleate              | ✓                                | ✗                              | Histamine H1 receptor antagonist                | ✓                | Contemporary Drug Synthesis. 2004                |
| (±)-gamma-Vinyl GABA           | ✓                                | ✗                              | GABA transaminase inhibitor                     | ✓                | Br J Clin Pharmacol. 2014 Nov; 78(5): 981–995    |
| XCT790                         | ✓                                | ✗                              | Estrogen-related receptor alpha inverse agonist | Unknown          | Biochemistry. 2014 Jul; 53(29): 4839-46          |
| Ethopropazine hydrochloride    | ✓                                | ✗                              | Anti-parkinsonian                               | Unknown          | J Nerv Ment Dis. 1948 Aug; 108(2): 118-28        |
| Methantheline bromide          | ✓                                | ✗                              | Antispastic                                     | ✓                | Ann Pharmacother. 1995 May; 29(5): 489-92        |
| Daurisoline                    | ✓                                | ✗                              | Anti-inflammatory, hERG channel blocker         | ✓                | Neuroreport. 1994 Jul; 5(12): 1489-92            |
| PAPP                           | ✓                                | ✗                              | Serotonin receptor agonist                      | Unknown          | Advances in Drug Research (Vol. 17), 2013        |
| Bay 11-7085                    | ✓                                | ✗                              | Inhibitor of NFκB                               | Unknown          | Exp Hematol. 2007 Oct; 35(10): 1495-509          |
| (-)-Eseroline fumarate salt    | ✗                                |                                | Acetylcholinesterase inhibitor                  | ✗                | Enzyme Inhib Med Chem. 2002 Oct; 17(5): 279-85   |
| Clonixin Lysinate              | ✗                                |                                | Anti-inflammatory                               | Unknown          | Clin Pharmacol New Drugs. 1971 Sep; 11(5): 371-7 |
| Methylhydantoin-5-(D)          | ✗                                |                                | Anti-epileptic                                  | Unknown          | J Nerv Ment Dis. 1948 Aug; 108(2): 118-28        |
| Tomatidine                     | ✗                                |                                | Functional acid sphingomyelinase inhibitor      | Suggested        | PLoS One. 2011; 6(8): e23852                     |
| Verruculogen                   | ✗                                |                                | Potassium channel blocker                       | ✓                | Mar Drugs. 2016 Nov; 14(11): 208                 |
| Oxyphenbutazone                |                                  |                                | Anti-inflammatory                               | ✓                | Eur J Clin Pharmacol. 1983; 25: 107              |
| DL-alpha-Methyl-p-tyrosine     |                                  |                                | Tyrosine hydroxylase inhibitor                  | ✓                | Br J Pharmac. 1986; 88: 285-290                  |
| Dopamine hydrochloride         |                                  |                                | Various uses, primarily for low blood pressure  | ✗                | Drug Discov Today. 2007 Jan; 12(1-2): 54-61      |
| Oxaprozol                      |                                  |                                | Anti-inflammatory                               | Unknown          | Clin Pharmacol Ther. 2005 May; 6(5): 777-85      |
| Tyrphostin 23                  |                                  |                                | EGFR inhibitor                                  | Unknown          | Neurochem Res. 2016 Oct; 41(10): 2607-18         |
| Fursultiamine Hydrochloride    |                                  |                                | Used for vitamin B1 deficiency                  | Unknown          | Med Sci Monit. 2004 Sep; 10(9):199-203           |
| Imatinib                       |                                  |                                | Tyrosine kinase inhibitor                       | Poor             | Blood. 2008 Aug 15; 112(4): 1005-12              |
| Candesartan                    |                                  |                                | Angiotensin II receptor antagonist              | ✓                | Curr Med Res Opin. 2003; 19(5): 449-51           |
| Idazoxan hydrochloride         |                                  |                                | Adrenergic receptor antagonist                  | ✓                | Anesthesiology. 1989 Jul; 71(1): 75-9            |
| Daphnetin                      |                                  |                                | Protein kinase inhibitor                        | Unknown          | Eur J Pharmacol. 2011 Oct; 668(1-2): 35-41       |
| Viloxazine hydrochloride       |                                  |                                | Norepinephrine reuptake inhibitor               | ✓                | Analogue-based Drug Discovery II, 2010           |
| Lamotrigine                    |                                  |                                | Voltage-gated sodium channel inhibitor          | ✓                | Biochem Pharmacol. 2012 Mar; 83(6): 805-14       |
| (S)-3,5-Dihydroxyphenylglycine |                                  |                                | Glutamate receptor agonist                      | Unknown          | CNS Drug Rev. 2002; 8(1): 101-16                 |
| Carmustine                     |                                  |                                | DNA alkylating agent                            | ✓                | Handbook of Brain Tumor Chemotherapy, 2006       |
| Promethazine hydrochloride     |                                  |                                | Histamine H1 receptor antagonist                | ✓                | Arch Dermatol Res. 2012 May; 304(4): 263–272     |
| Pizotifen malate               |                                  |                                | Serotonin receptor antagonist                   | ✓                | Science and Practice in Clinical Neurology, 1993 |
| Zuclopentixol dihydrochloride  |                                  |                                | Dopamine receptor antagonist                    | ✓                | Drugs in Psychiatry, 2013                        |
| Meropenem                      | Cannot test in <i>C. elegans</i> |                                | Antibacterial                                   | ✓                | Clin Microbiol Rev. 2010 Oct; 23(4): 858-883     |

**Table S1.** Compounds identified from *C. elegans* drug screen and their properties

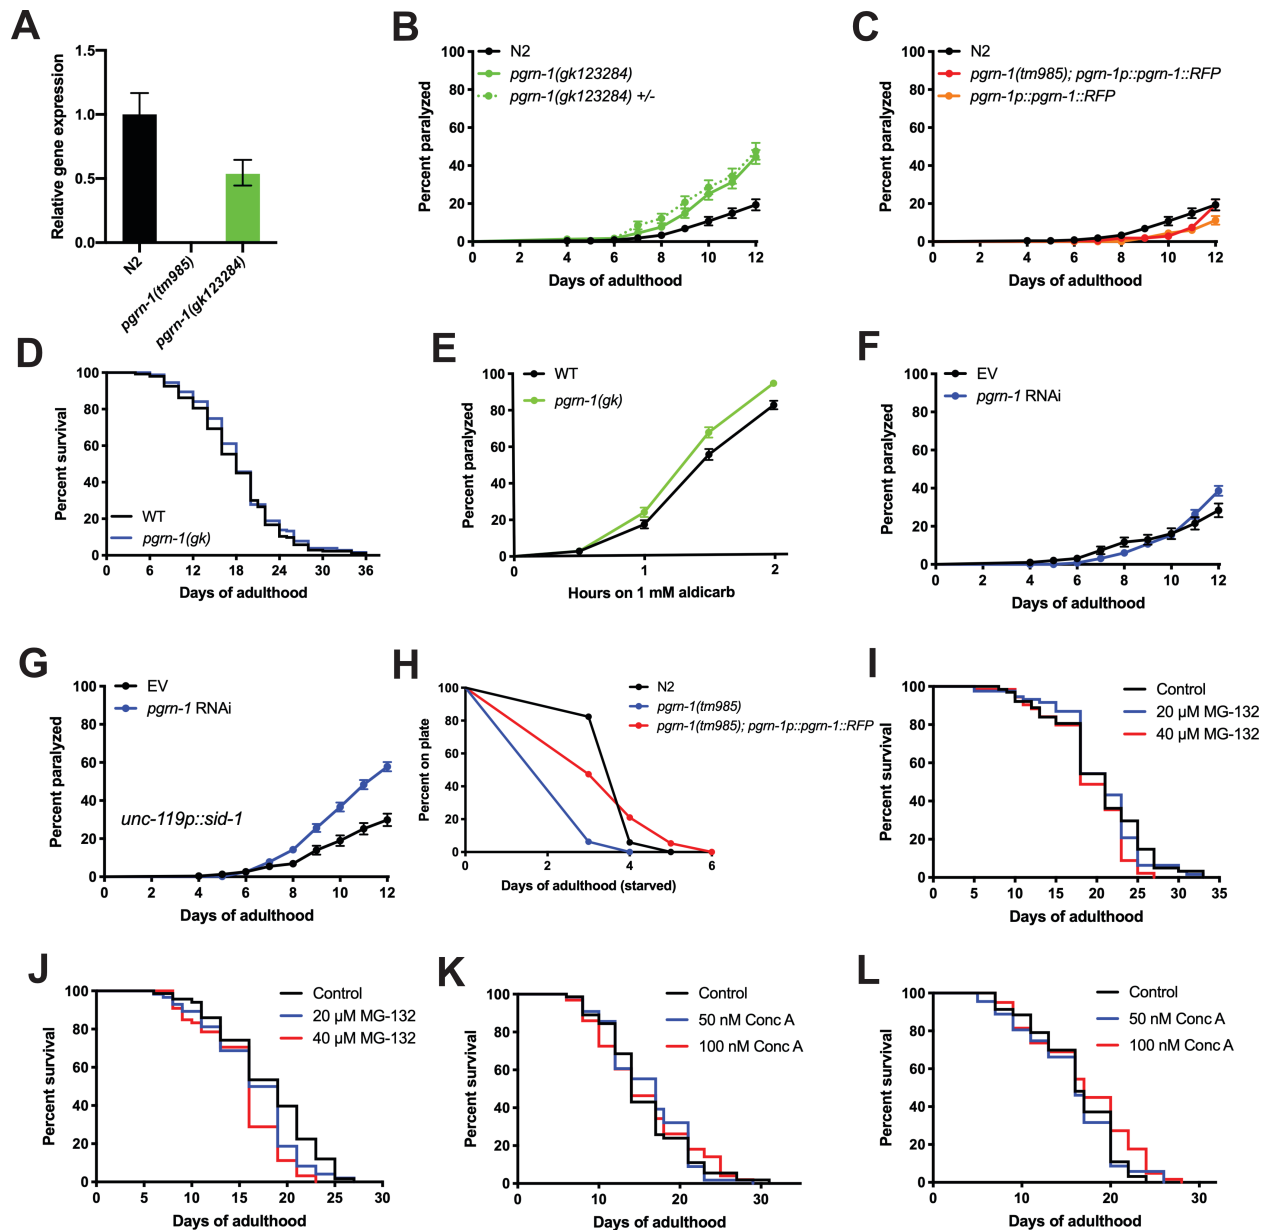

**Figure S1.** (A) Quantitative gene expression reveals that *pgrn-1(gk)* animals show a marked reduction in *pgrn-1* mRNA expression, while it could not be detected in *pgrn-1(tm985)* mutants (Student's *t* test: N2 vs. *pgrn-1(tm985)*, \*\*\*\* $P < 0.0001$ ; N2 vs. *pgrn-1(gk)*, \*\*\*\* $P < 0.0001$ ). (B) *pgrn-1(gk)* animals display higher levels of age-dependent paralysis than N2 animals, and heterozygous *pgrn-1(gk)/+* animals display the same levels of paralysis as homozygous mutant

animals (Mantel-Cox test, N2 vs. *pgrn-1(gk)*, \*\*\*\* $P < 0.0001$ ; *pgrn-1(gk)* vs. *pgrn-1(gk)/+*, n.s.). (C) Overexpression of *pgrn-1::rfp* in a *pgrn-1(tm985)* background display similar levels of paralysis as N2 animals, whereas expressed in a wild-type background results in a slight decrease in paralysis (Mantel-Cox test: N2 vs. *pgrn-1(tm985); pgrn-1::rfp*, n.s.; N2 vs. *pgrn-1::rfp*, \* $P < 0.05$ ). (D) Lifespan is unaffected in *pgrn-1(gk)* animals (Mantel-Cox test, n.s.). (E) *pgrn-1(gk)* animals display heightened aldicarb hypersensitivity compared to N2 animals (Mantel-Cox test, \*\*\*\* $P < 0.0001$ ). (F-G) Knockdown of *pgrn-1* in N2 animals (F) does not result in an increase in paralysis, while the knockdown in neurons does (G) (Mantel-Cox test: RNAi in N2 (F), n.s.; neuronal RNAi (G), \*\*\*\* $P < 0.0001$ ). (H) Nematodes lacking *pgrn-1* display an overactive food-seeking behavior and crawl off NGM plates faster than N2 controls; this phenotype is partially rescued by re-expression of *pgrn-1::rfp* (Mantel-Cox test: N2 vs. *pgrn-1(tm985)*, \*\*\*\* $P < 0.0001$ ; *pgrn-1(tm985)* vs. *pgrn-1(tm985); pgrn-1::rfp*, \*\* $P < 0.01$ ). (I) Treatment of N2 animals with either 20 or 40  $\mu\text{M}$  MG-132 did not result in a decrease in lifespan (Mantel-Cox test: Vehicle vs. 20  $\mu\text{M}$ , n.s.; Vehicle vs. 40  $\mu\text{M}$ , n.s.). (J) Treatment of *pgrn-1::rfp* animals with 20  $\mu\text{M}$  MG-132 did not result in a decrease in lifespan but treatment with 40  $\mu\text{M}$  MG-132 did (Mantel-Cox test: Vehicle vs. 20  $\mu\text{M}$ , n.s.; Vehicle vs. 40  $\mu\text{M}$ , \*\*\*\* $P < 0.001$ ). (K) Treatment of N2 animals with either 50 or 100 nM Concanamycin A did not result in a decrease in lifespan (Mantel-Cox test: Vehicle vs. 50 nM, n.s.; Vehicle vs. 100 nM, n.s.). (L) Treatment of *pgrn-1::rfp* animals with either 50 or 100 nM Concanamycin A did not result in a decrease in lifespan (Mantel-Cox test: Vehicle vs. 50 nM, n.s.; Vehicle vs. 100 nM, n.s.).

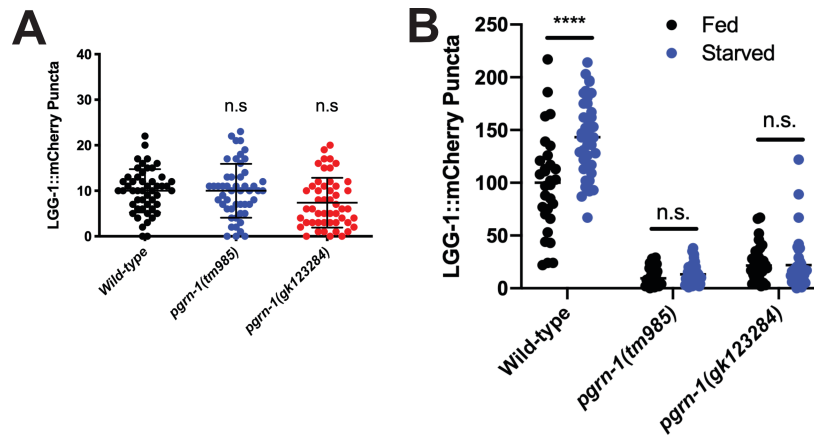

**Figure S2.** (A) Both *pgrn-1* mutations did not alter LGG-1::mCherry puncta formation at day 1 of adulthood (Student's *t* test: WT vs. *pgrn-1(tm985)*, n.s.; WT vs. *pgrn-1(gk123284)*, n.s.). (B) Starvation conditions induced autophagy in WT animals, but had no effect on autophagy in both *pgrn-1* mutants (Student's *t* test, Fed vs. Starved: WT, \*\*\*\* $p < 0.0001$ ; *pgrn-1(tm)*, n.s.; *pgrn-1(gk)*, n.s.).

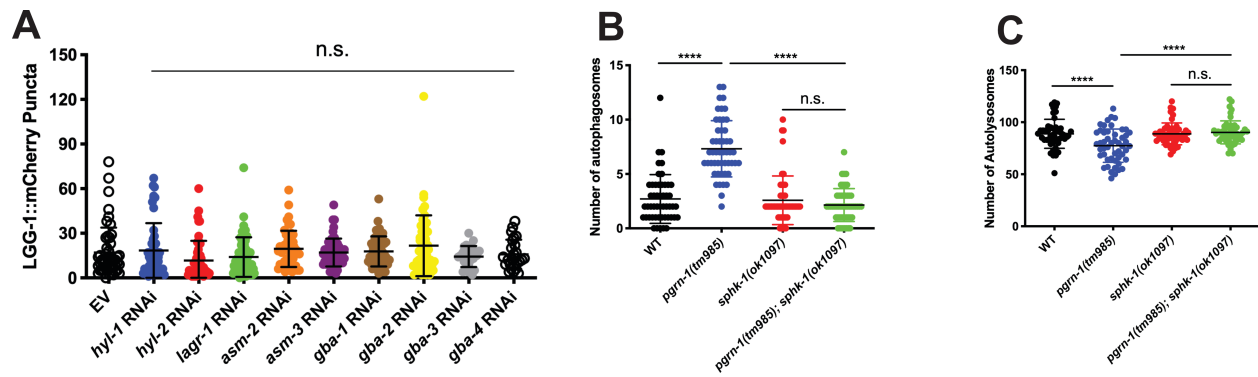

**Figure S3.** (A) RNAi knockdown of the corresponding genes did not significantly affect formation of LGG-1::mCherry puncta in *pgrn-1(tm985)* mutants. (B-C) The genetic double mutant, *sphk-1(ok1097); pgrn-1(tm)*, had restored levels of autophagosomes (B) and autolysosomes (C) in animals' neurons (One-way ANOVA, autophagosomes: WT vs. double mutant, n.s.; double mutant vs. *pgrn-1(tm)*, \*\*\*\* $p < 0.0001$ ; autolysosomes: WT vs. double mutant, n.s.; double mutant vs. *pgrn-1(tm)*, \*\*\*\* $p < 0.0001$ ).

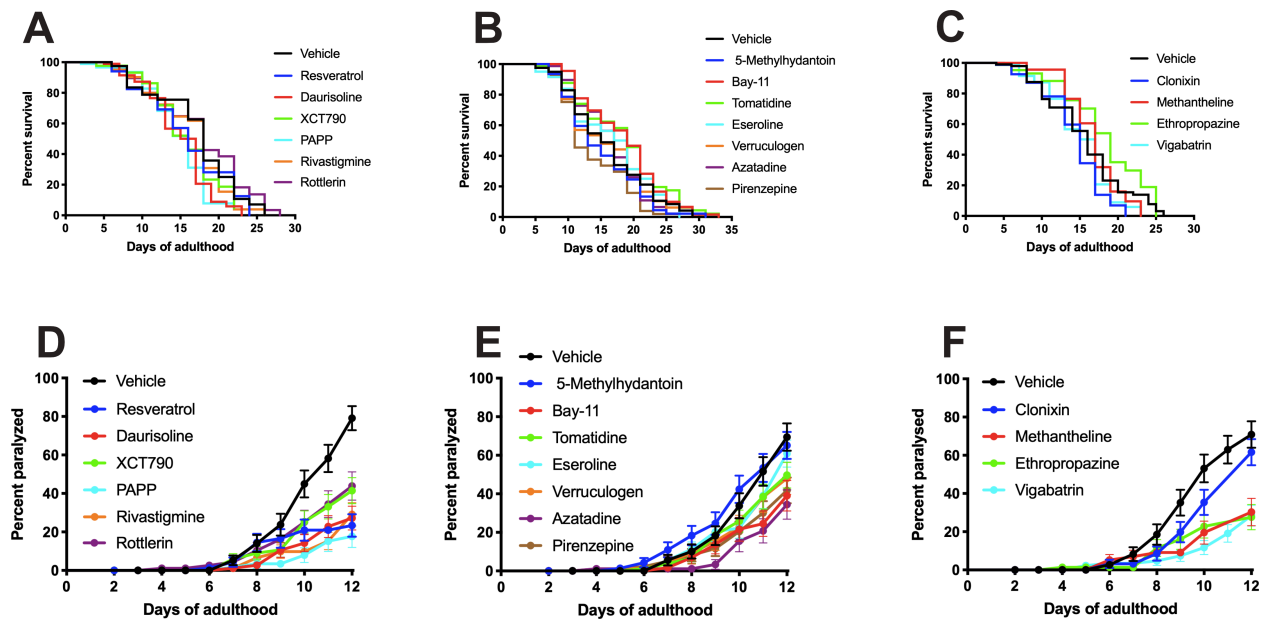

**Figure S4.** (A-C) Validation of top 17 drugs from the liquid culture screen for their ability to influence lifespan in *pgrn-1(tm)* mutants (Mantel-Cox test, treatment condition vs. Vehicle control. A: Resveratrol, n.s.; Daurisoline,  $**p < 0.01$ ; XCT790, n.s.; PAPP, n.s.; Rivastigmine, n.s.; Rottlerin, n.s. B: 5-Methylhydantoin, n.s.; Bay-11, n.s.; Tomatidine, n.s.; Eseroline, n.s.; Verruculogen, n.s.; Azatadine, n.s.; Pirenzepine,  $*p < 0.05$ . C: Clonixin, n.s.; Methantheline,  $**p < 0.01$ ; Ethropropazine,  $****p < 0.0001$ ; Vigabatrin, n.s.). (D-F) Validation of top 17 drugs on the paralysis phenotype exhibited by *pgrn-1(tm)* nematodes (Mantel-Cox test, treatment condition vs. Vehicle control. A: Resveratrol,  $****p < 0.0001$ ; Daurisoline,  $****p < 0.0001$ ; XCT790,  $***p < 0.001$ ; PAPP,  $****p < 0.0001$ ; Rivastigmine,  $****p < 0.0001$ ; Rottlerin,  $**p < 0.01$ . B: 5-Methylhydantoin, n.s.; Bay-11,  $*p < 0.05$ ; Tomatidine, n.s.; Eseroline, n.s.; Verruculogen, n.s.; Azatadine,  $***p < 0.001$ ; Pirenzepine,  $*p < 0.05$ . C: Clonixin, n.s.; Methantheline,  $***p < 0.001$ ; Ethropropazine,  $***p < 0.001$ ; Vigabatrin,  $****p < 0.0001$ ).

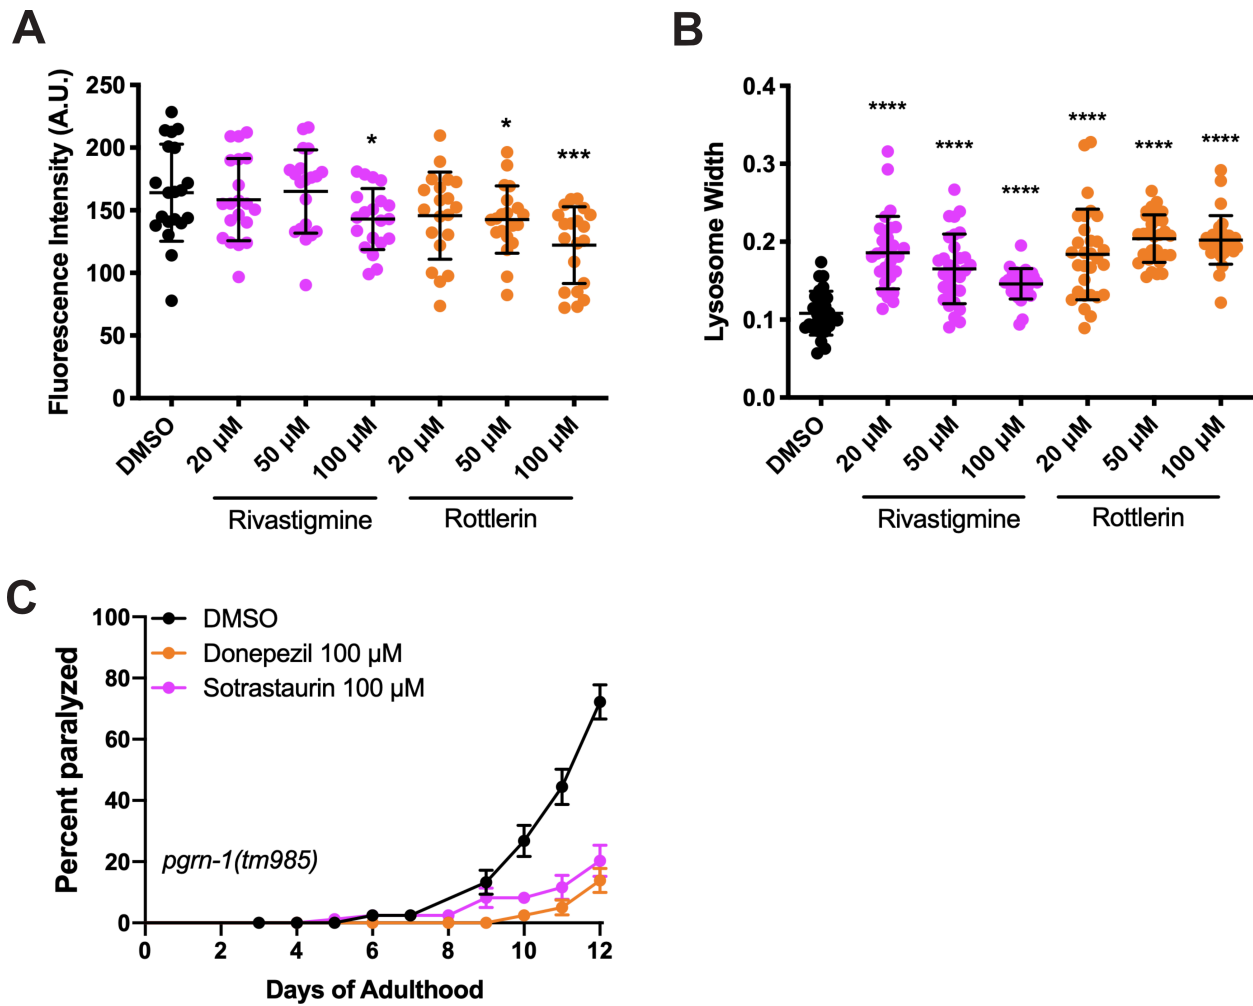

**Figure S5.** (A-B) Dose-dependent testing of rottlerin and rivastigmine against lysosomal phenotypes (Student's *t* test, A: DMSO control vs. treatment condition: 100 μM rivastigmine \**p*<0.05, 50 μM rottlerin \**p*<0.05, 100 μM Rottlerin \*\*\**p*<0.001; B: DMSO control vs. all treatment conditions, \*\*\*\**p*<0.0001). (C) Donepezil and sotrastaurin restore paralysis phenotypes in *pgrn-1(tm)* animals (Mantel Cox test, \*\*\*\**p*<0.0001)
